# Supplementary material for: Impact of bottom electrode materials on the crystallographic orientation and ferroelectric performance of Al 0.8 Sc 0.2 N thin films
Source: Royal Society of Chemistry journal article supplement (doi:10.1039/d5nr03449c), 2025-01-01
Supplement: d5nr03449c1.pdf [file d5nr03449c1.pdf]

## Supplement

### Impact of Bottom Electrode Materials on the Crystallographic Orientation and Ferroelectric Performance of $\text{Al}_{0.8}\text{Sc}_{0.2}\text{N}$ Thin Film

Jinyang Sui<sup>a</sup>, Bin Zhang<sup>a</sup>, Wenjin Zhao<sup>a</sup>, Xiaoxia Gao<sup>b</sup>, Yi Tong<sup>c</sup>, Xinpeng Wang<sup>c</sup>,  
Dayu Zhou<sup>a\*</sup>.

<sup>a</sup>Key Laboratory of Materials Modification by Laser, Ion, and Electron Beams (Ministry of Education), School of Materials Science and Engineering, Dalian University of Technology, Dalian, 116024, China.

<sup>b</sup>Instrumental Analysis Center of Dalian University of Technology, Dalian University of Technology, Dalian, 116024, China.

<sup>c</sup>Suzhou Laboratory, RuoShui Road No.388, Suzhou, 215009, China.

\*Corresponding author: E-mail: [zhoudayu@dlut.edu.cn](mailto:zhoudayu@dlut.edu.cn)

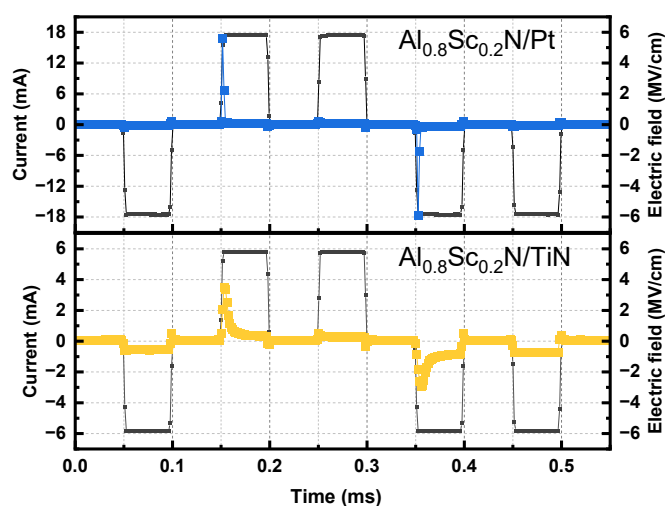

S. 1. Since cyclic loading is a continuous square wave, the electric field used in cyclic loading is much smaller than the maximum electric field of triangular waveform used before in DHM. We use the same pulse width and electric field amplitude as cycling test for the pulse wave positive-up-negative-down (PUND) test to demonstrate effective

switching for both samples.

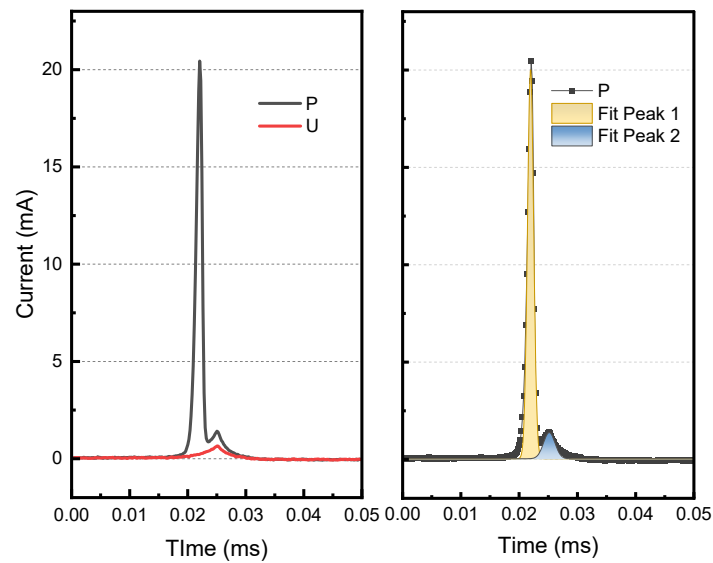

S. 2. Triangular-PUND cannot compensate for the leakage current completely, and an example of P and U pulses is shown in S. 2. Left. To extract a good approximation for the remanent polarization of the films, we compensated I-t in P(N) pulses for the leakage current by peak fitting (See S. 2. Right). Fit peak 1 is considered as ferroelectric current peak. It is worth noting that ferroelectric polarization switching is not a single process, so a single Gaussian peak cannot fully represent the dynamic process. Thus, there is a certain error in peak fitting.

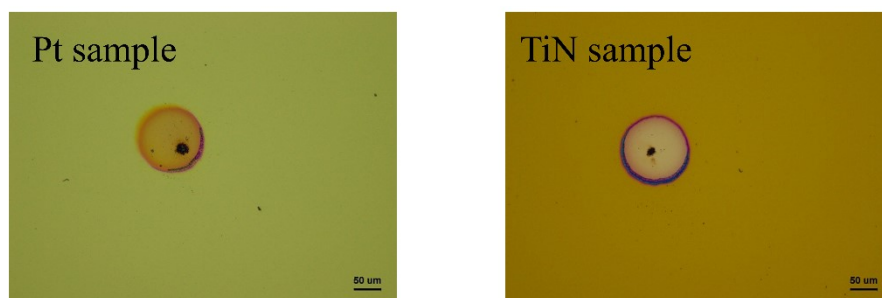

S. 3. Electrode images after failure, (left) Pt sample and (right) TiN sample.
